# Supplementary material
Source: publisher figshare collection journal article supplement (https://acs.figshare.com/ndownloader/files/21788274)
Supplement: Supplementary file 1 [file 21788274]

## Supporting information

# The chalcogenide perovskite BaZrS<sub>3</sub>: Thin film growth by sputtering and rapid thermal processing

*Corrado Comparotto<sup>\*</sup>, Alexandra Davydova, Tove Ericson, Lars Riekehr, Marcos V. Moro,*

*Tomas Kubart, Jonathan Scragg*

Ångström Solar Centre, Solid State Electronics

\*E-mail: [corrado.comparotto@angstrom.uu.se](mailto:corrado.comparotto@angstrom.uu.se)

Herein additional STEM bright field images and EDS maps of Ba, Zr, S, O, Si, Au, Pt, Pd, and F are reported. They were measured at 100°, 120°, and 180° on a compositionally graded sample annealed at 900°C. The EDS maps were recorded on the same area where STEM was performed.

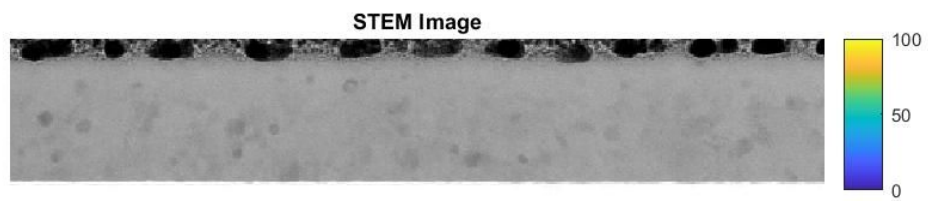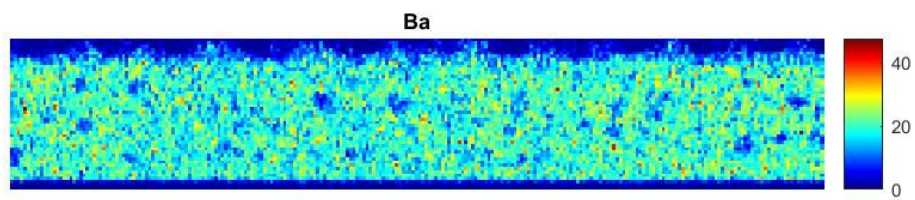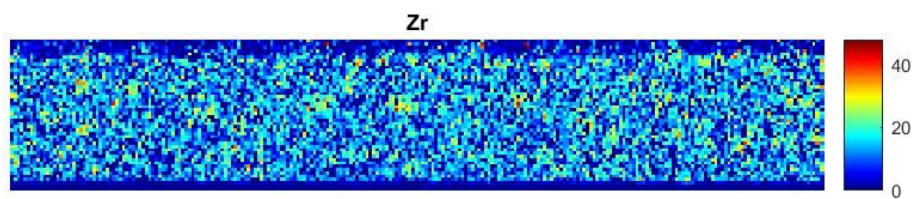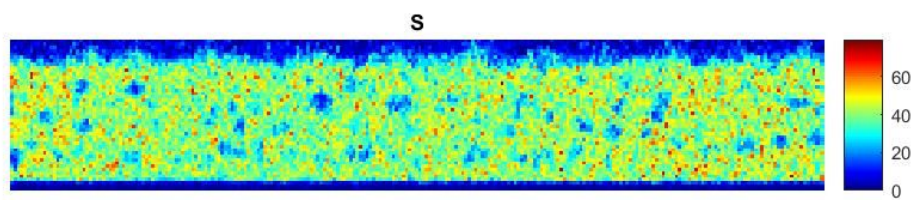

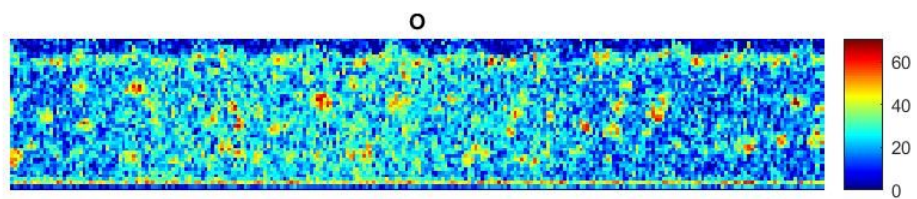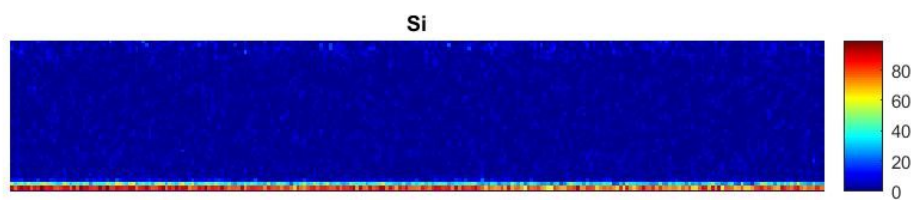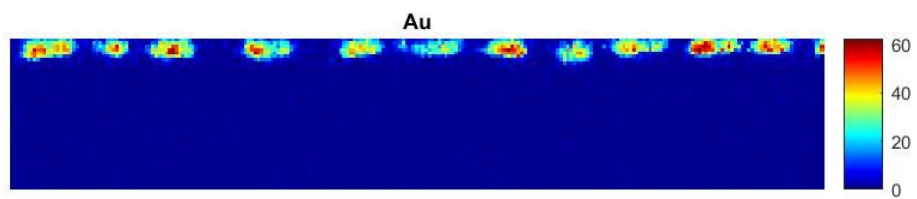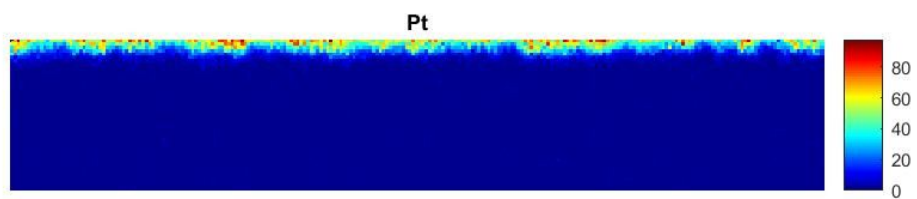

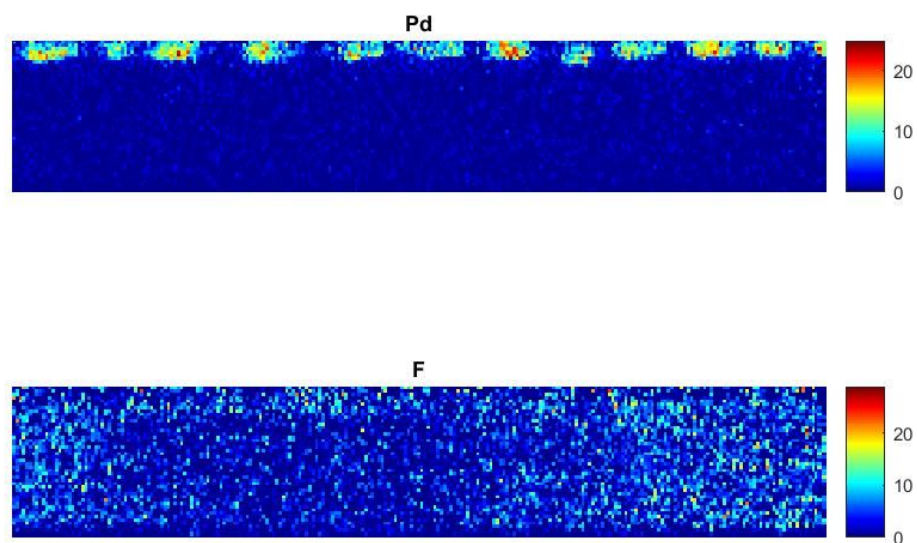

**Figure S1.** STEM bright field image measured at  $100^\circ$  on a compositionally graded sample annealed at  $900^\circ\text{C}$ ; EDS maps of different elements recorded on the same area where STEM was performed.

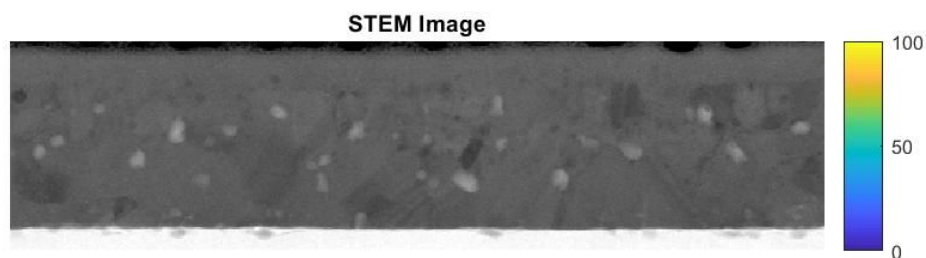

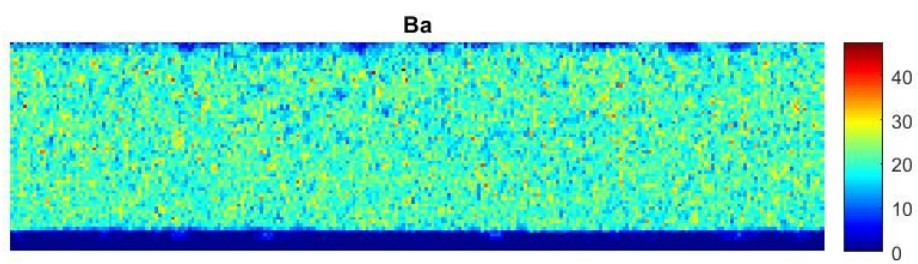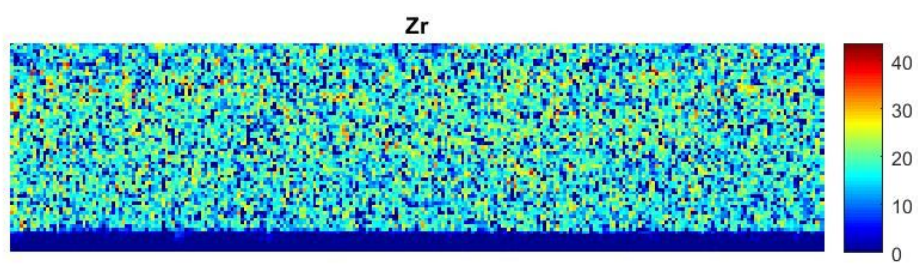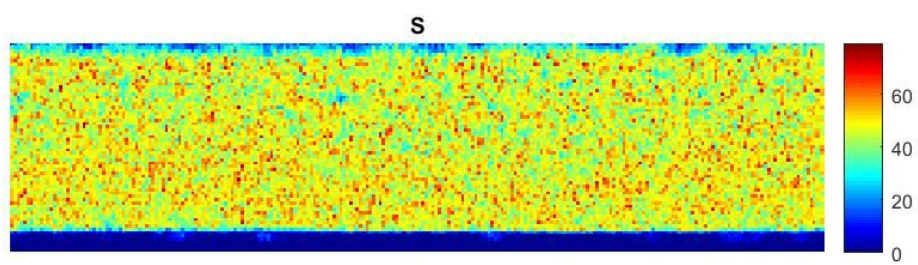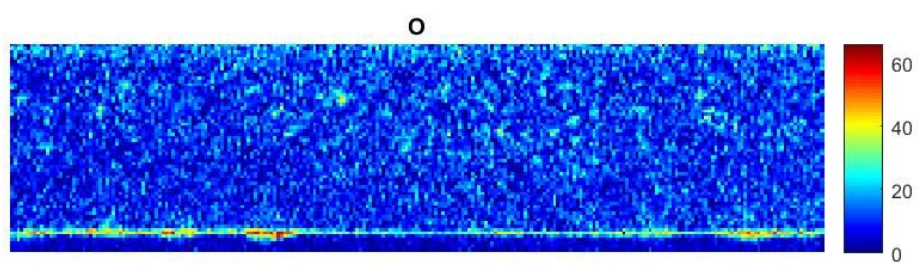



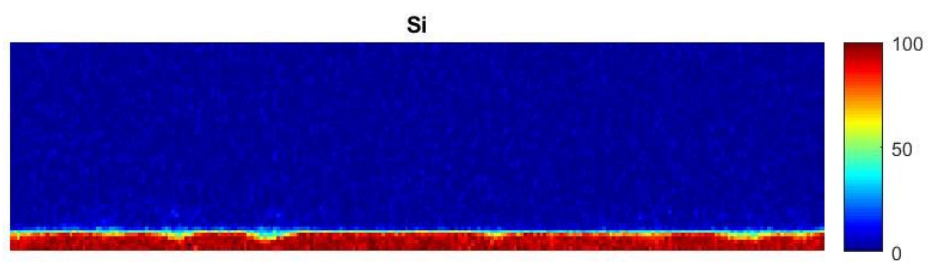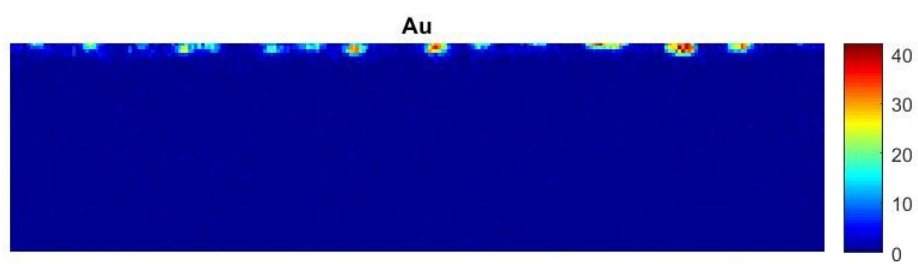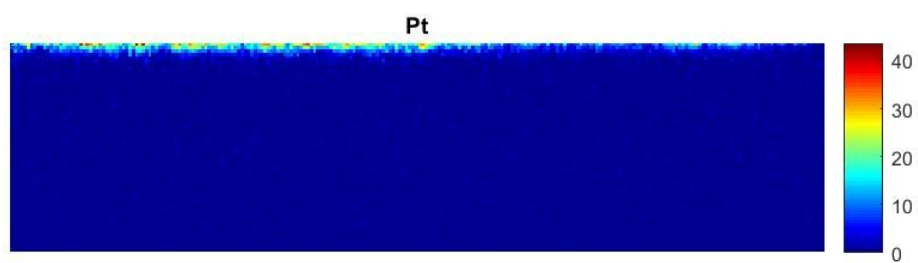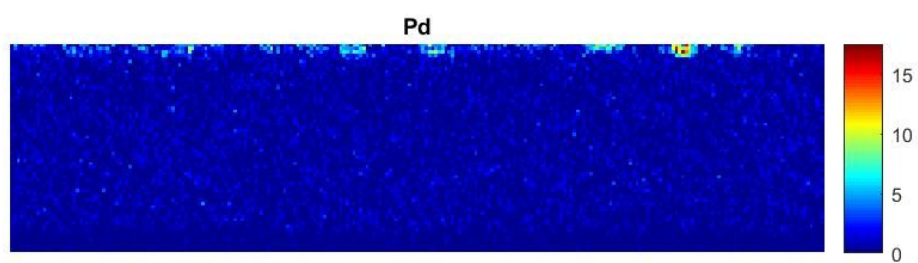

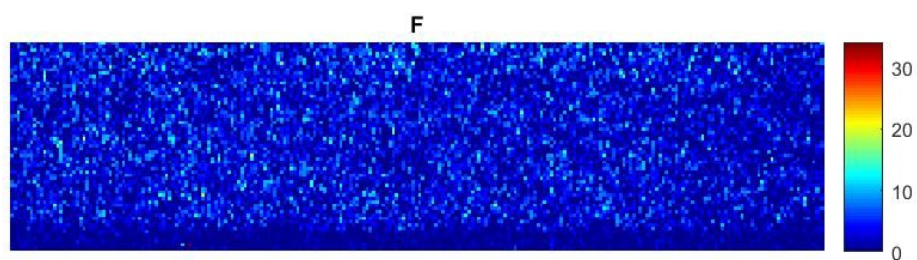

**Figure S2.** STEM bright field image measured at  $120^\circ$  on a compositionally graded sample annealed at  $900^\circ\text{C}$ ; EDS maps of different elements recorded on the same area where STEM was performed.

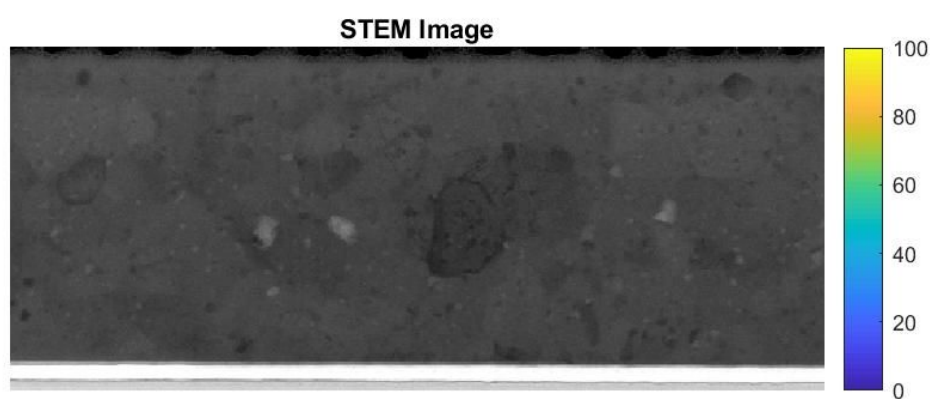

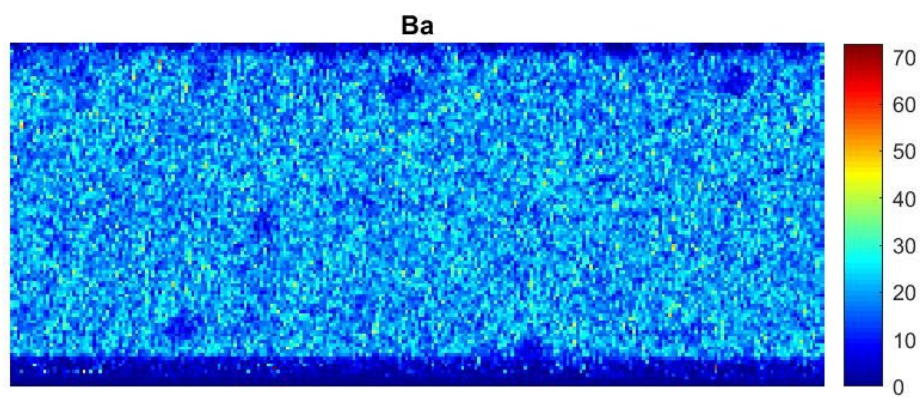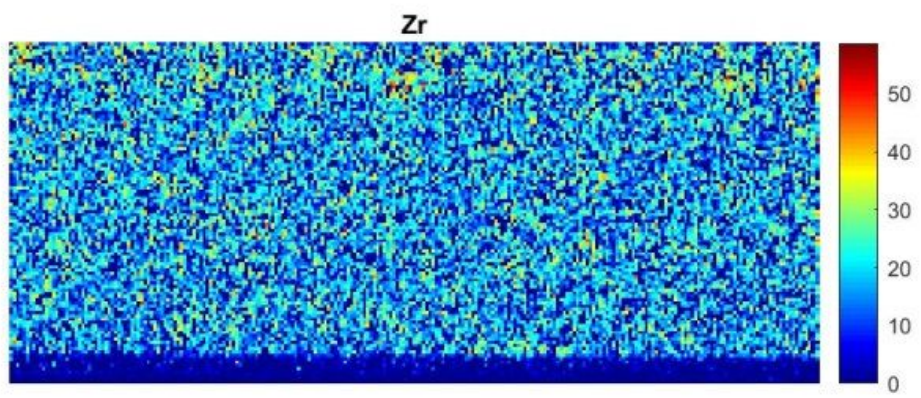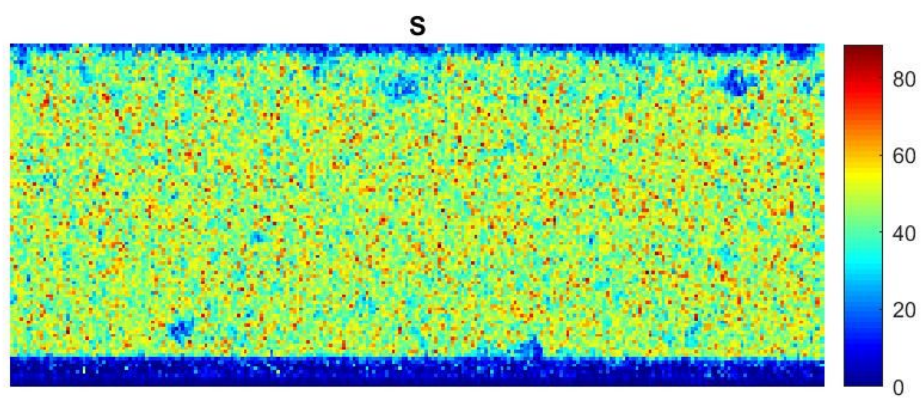



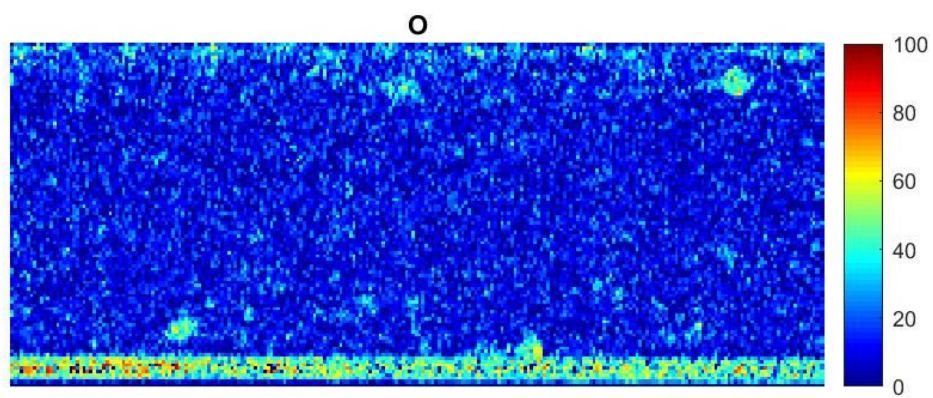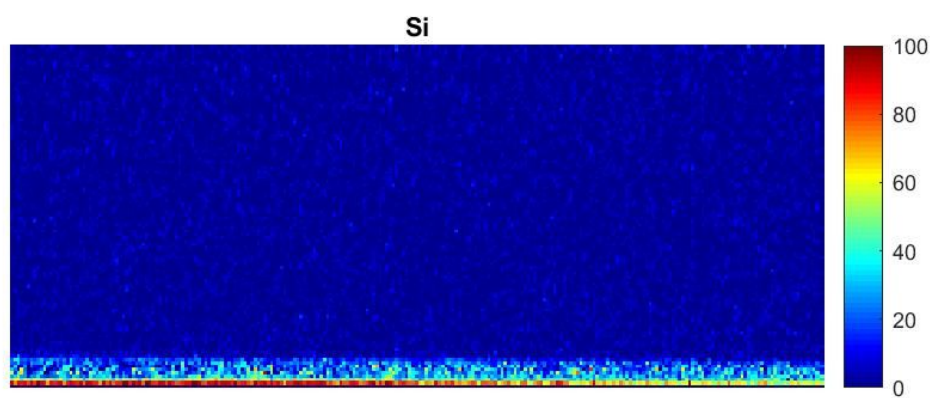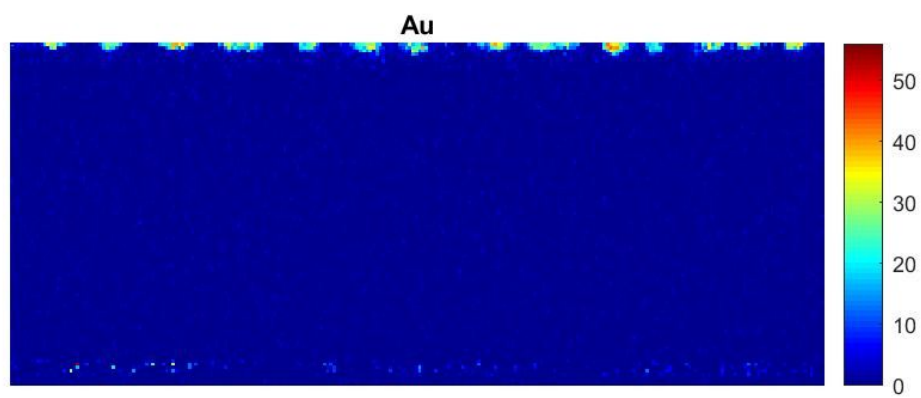

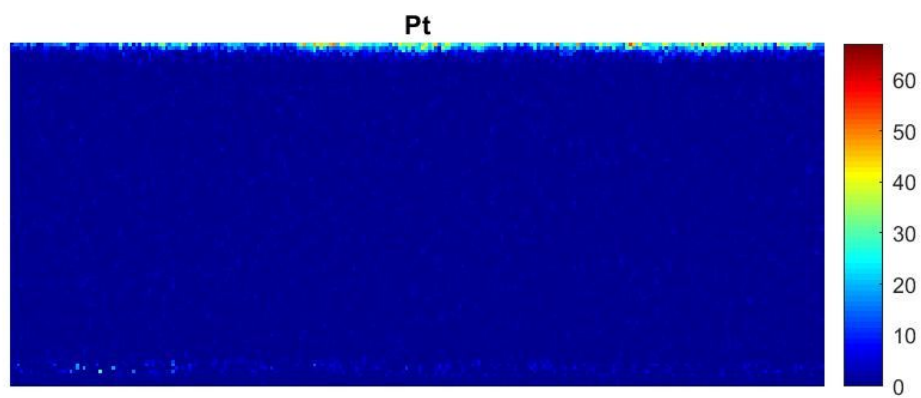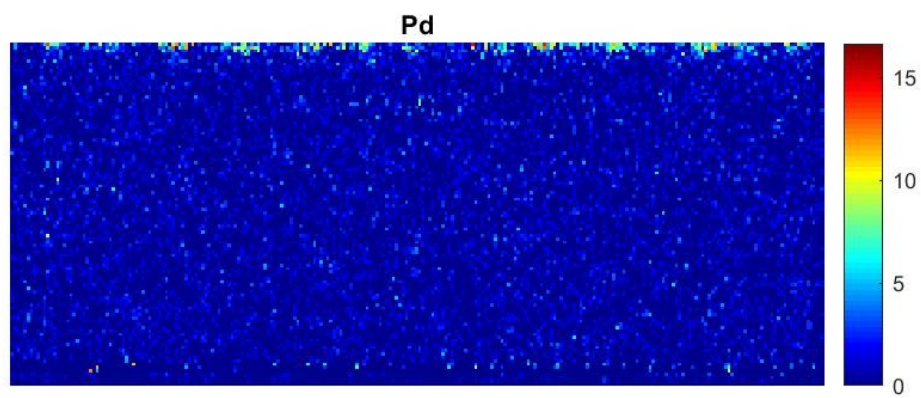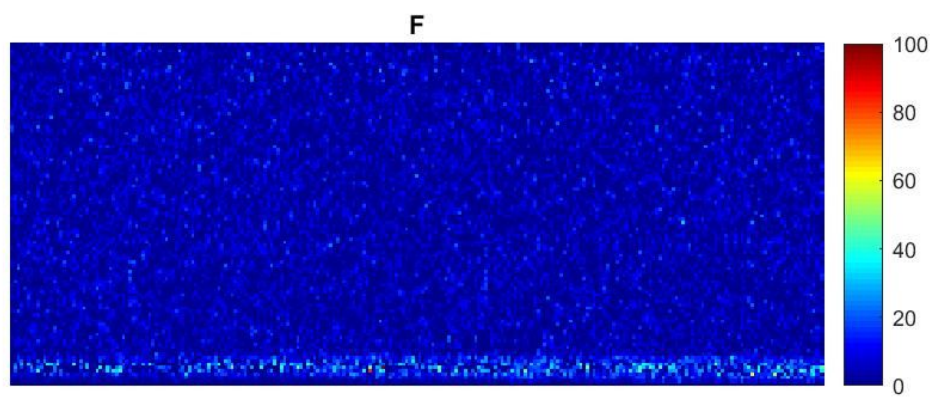

**Figure S3.** STEM bright field image measured at  $180^\circ$  on a compositionally graded sample annealed at  $900^\circ\text{C}$ ; EDS maps of different elements recorded on the same where STEM was performed.
